# Supplementary material for: Diagnostic value of plasma p-tau181, NfL, and GFAP in a clinical setting cohort of prevalent neurodegenerative dementias
Source: Springer Nature journal article supplement (doi:10.1186/s13195-022-01093-6), 2022-10-12

## ADDITIONAL FILE 1

### SUPPLEMENTARY MATERIALS

#### List of contents

|               |    |
|---------------|----|
| Table S1..... | 2  |
| Table S2..... | 3  |
| Table S3..... | 4  |
| Table S4..... | 5  |
| Table S5..... | 6  |
| Fig. S1.....  | 7  |
| Fig. S2.....  | 8  |
| Fig. S3.....  | 9  |
| Fig. S4.....  | 10 |

**Table S1.** Clinical features and results of indicative biomarkers in the DLB group.

| Variable                                                        | N=49         |
|-----------------------------------------------------------------|--------------|
| Clinical core feature, No. (%)                                  |              |
| Fluctuations                                                    | 17 (34.7)    |
| Visual hallucinations                                           | 29 (59.2)    |
| REM sleep behavior disorder                                     | 23 (46.9)    |
| Parkinsonism                                                    | 45 (91.8)    |
| 1 out 4 clinical core features                                  | 9 (18.4)     |
| 2 out 4 clinical core features                                  | 21 (42.9)    |
| 3 out 4 clinical core features                                  | 13 (26.5)    |
| 4 of 4 clinical core features                                   | 6 (12.2)     |
| Biomarker, No. of patients with positive finding/No. tested (%) |              |
| DaTscan                                                         | 25/29 (86.2) |
| <sup>123</sup> I-MIBG uptake at myocardial scintigraphy         | 10/11 (90.9) |
| REM sleep without atonia at PSG                                 | 10/14 (71.4) |

**Table S2.** CSF NfL, GFAP and AD core biomarker values across diagnostic groups.

|                 | FTD                                | PSP                                | CBS                                | DLB                                | AD                                 | SNAP                 |
|-----------------|------------------------------------|------------------------------------|------------------------------------|------------------------------------|------------------------------------|----------------------|
| n               | 59                                 | 31                                 | 29                                 | 49                                 | 97                                 | 51                   |
| NfL             | 2459<br>(1492-4676) <sup>a-e</sup> | 1664<br>(1109-2086) <sup>f</sup>   | 1454<br>(1087-2481) <sup>c</sup>   | 1045<br>(789-1334)                 | 1061<br>(863-1508)                 | 1114<br>(676-2710)   |
| GFAP            | 9118<br>(5613-14385)               | 10383<br>(8248-15379)              | 12817<br>(8269-18309)              | 10635<br>(6507-16309)              | 11917<br>(8515-17388)              | 9462<br>(5517-14541) |
| t-tau           | 269<br>(201-381) <sup>d</sup>      | 200<br>(154-284) <sup>d</sup>      | 309<br>(215-478) <sup>d</sup>      | 246<br>(170-251) <sup>d</sup>      | 640<br>(492-986) <sup>e</sup>      | 256<br>(182-353)     |
| p-tau181        | 28<br>(23-36) <sup>d,g</sup>       | 30<br>(22-46) <sup>d,g</sup>       | 45<br>(31-81) <sup>d-f</sup>       | 31<br>(25-48) <sup>d</sup>         | 109<br>(82-153) <sup>e</sup>       | 31<br>(25-42)        |
| A $\beta$ 42/40 | 0.93<br>(0.82-0.99) <sup>c,d</sup> | 0.86<br>(0.78-0.97) <sup>d,f</sup> | 0.71<br>(0.56-0.94) <sup>d,e</sup> | 0.84<br>(0.56-0.93) <sup>d,e</sup> | 0.43<br>(0.39-0.49) <sup>e</sup>   | 0.94<br>(0.87-1.00)  |
| A $\beta$ 42    | 671<br>(533-671) <sup>d</sup>      | 585<br>(463-1016) <sup>d</sup>     | 578<br>(479-832)                   | 607<br>(350-759) <sup>h</sup>      | 476<br>(369-592) <sup>e</sup>      | 778<br>(541-1000)    |
| A $\beta$ 40    | 7510<br>(5732-9344) <sup>d</sup>   | 7731<br>(5657-11387) <sup>d</sup>  | 9191<br>(7159-11207) <sup>j</sup>  | 7348<br>(6679-9506) <sup>d</sup>   | 11165<br>(8891-13670) <sup>e</sup> | 8567<br>(6450-10729) |

Biomarker values are expressed in pg/ml as median (IQR range). <sup>a</sup> vs. PSP  $\leq 0.001$ ; <sup>b</sup> vs. CBS  $\leq 0.01$ ; <sup>c</sup> vs. DLB  $\leq 0.001$ ; <sup>d</sup> vs. AD  $\leq 0.001$ ; <sup>e</sup>NfL FTD vs SNAP  $< 0.001$ ; <sup>f</sup> vs. DLB  $\leq 0.05$ ; <sup>g</sup> vs. CBS  $\leq 0.001$ ; <sup>h</sup> vs. SNAP  $\leq 0.01$ ; <sup>j</sup> vs. AD  $\leq 0.05$ .

**Table S3.** Plasma NfL, GFAP and p-tau181 values across diagnostic groups.

|          | FTD                                   | PSP                                   | CBS                                   | DLB                                   | AD                                    | SNAP                                | HC                    |
|----------|---------------------------------------|---------------------------------------|---------------------------------------|---------------------------------------|---------------------------------------|-------------------------------------|-----------------------|
| n        | 59                                    | 31                                    | 29                                    | 49                                    | 97                                    | 51                                  | 60                    |
| NfL      | 44.9<br>(28.1-68.6) <sup>a,f</sup>    | 26.6<br>(18.5-36.0) <sup>f</sup>      | 24.5<br>(21.4-51.8) <sup>f,g</sup>    | 26.3<br>(15.9-38.2) <sup>f</sup>      | 21.9<br>(17.0-27.9) <sup>f</sup>      | 19.1<br>(12.6-28.7) <sup>f</sup>    | 10.1<br>(8.5-14.6)    |
| GFAP     | 198.2<br>(143.9-316.8) <sup>d,f</sup> | 235.2<br>(187.5-312.7) <sup>d,f</sup> | 302.9<br>(211.2-428.2) <sup>e,f</sup> | 293.6<br>(227.8-485.9) <sup>e,f</sup> | 404.7<br>(279.7-503.0) <sup>e,f</sup> | 177.4<br>(118.8-260.5) <sup>f</sup> | 121.9<br>(91.2-156.3) |
| p-tau181 | 1.1<br>(0.7-1.6) <sup>d</sup>         | 1.0<br>(0.8-1.7) <sup>d</sup>         | 1.1<br>(0.9-2.1) <sup>d</sup>         | 1.5<br>(0.8-2.6) <sup>d,f</sup>       | 3.2<br>(2.4-4.3) <sup>e,f</sup>       | 1.2<br>(0.8-1.9)                    | 1.0<br>(0.8-1.3)      |

Biomarker values are expressed in pg/ml as median (IQR range). <sup>a</sup> vs. PSP  $\leq 0.001$ ; <sup>b</sup> vs. CBS  $\leq 0.001$ ; <sup>c</sup> vs. DLB  $\leq 0.001$ ; <sup>d</sup> vs. AD  $\leq 0.001$ ; <sup>e</sup> vs. SNAP  $\leq 0.001$ ; <sup>f</sup> vs. HC  $\leq 0.001$ ; <sup>g</sup> vs. SNAP  $\leq 0.01$ .

**Table S4.** CSF and plasma NfL, GFAP and p-tau181 across FTD phenotypic continuum.

|               | <i>pure FTD</i>     |                     |                     |                     | <i>FTD plus</i>     |                     |                     |
|---------------|---------------------|---------------------|---------------------|---------------------|---------------------|---------------------|---------------------|
| phenotype     | All                 | BvFTD               | nvPPA               | lvPPA               | All                 | FTD+park            | FTD+ALS             |
| n             | 43*                 | 33                  | 6                   | 2                   | 16                  | 8                   | 8                   |
| <b>CSF</b>    |                     |                     |                     |                     |                     |                     |                     |
| NfL           | 2376 (1485-4405)    | 2150 (1389-4253)    | 4008 (2643-4872)    | 2190 (1920-2459)    | 3214 (1511-7063)    | 2776 (1660-6982)    | 4121 (1409-14846)   |
| p-tau         | 28.0 (23.0-36.0)    | 27.0 (22.0-35.0)    | 33.5 (22.8-43.8)    | 38.0 (28.0-48.0)    | 29.0 (23.3-38.3)    | 26.0 (21.5-38.3)    | 31.0 (24.8-46.5)    |
| GFAP          | 9351 (5594-16399)   | 8231 (5280-16052)   | 9759 (6350-15878)   | -                   | 5658 (4801-11577)   | 5939 (4862-7281)    | 5658 (3958-12180)   |
| <b>Plasma</b> |                     |                     |                     |                     |                     |                     |                     |
| NfL           | 44.9 (26.7-64.3)    | 42.6 (26.5-66.2)    | 54.8 (25.2-67.3)    | 26.8 (16.6-37.0)    | 49.9 (34.3-113.1)   | 59.8 (43.0-96.9)    | 41.2 (29.2-292.6)   |
| p-tau         | 1.0 (0.7-1.5)       | 1.0 (0.7-1.4)       | 0.9 (0.6-1.6)       | 0.9 (0.8-1.1)       | 1.3 (0.6-1.7)       | 1.2 (0.7-1.6)       | 1.3 (0.6-1.9)       |
| GFAP          | 189.5 (130.9-273.0) | 169.5 (134.5-282.4) | 158.2 (120.8-219.3) | 144.0 (102.1-185.9) | 295.9 (180.5-337.5) | 319.3 (263.5-365.8) | 192.3 (160.0-326.5) |

Biomarker values are expressed in pg/ml as median (IQR range). \*Includes 2 cases with mixed BvFTD/PPA features.

**Table S5.** CSF and plasma NfL, GFAP and p-tau181 in genetic and sporadic FTD.

|               | genetic <sup>#</sup>             |                                  |                    |                               | sporadic <sup>#</sup> |
|---------------|----------------------------------|----------------------------------|--------------------|-------------------------------|-----------------------|
| mutation      | <i>C9orf72</i>                   | <i>GRN</i>                       | Others             | All                           |                       |
| n             | 7                                | 6                                | 5                  | 18                            | 41                    |
| <b>CSF</b>    |                                  |                                  |                    |                               |                       |
| NfL           | 4498 (1492-4844)                 | 5604 (3910-7394)                 | 3565 (1490-8153)   | 4502 (2085-6409) <sup>a</sup> | 2150 (1390-3800)      |
| p-tau         | 42 (16-51)                       | 25 (20-28)                       | 35 (28-42)         | 28 (22-43)                    | 28 (23-34)            |
| GFAP          | 9759 (5432-12180)                | 14121 (9332-31687)               | 8231 (5539-17150)  | 10690 (7346-16948)            | 6865 (5096-12723)     |
| <b>Plasma</b> |                                  |                                  |                    |                               |                       |
| NfL           | 42.8 (28.1-69.1)                 | 72.6 (63.9-79.4)                 | 39.6 (17.1-84.8)   | 57.2 (30.5-76.1)              | 43.6 (26.9-64.3)      |
| p-tau         | 1.4 (0.6-1.7)                    | 0.9 (0.6-1.2)                    | 0.7 (0.3-2.4)      | 0.9 (0.6-1.7)                 | 1.1 (0.8-1.6)         |
| GFAP          | 153.8 (132.6-187.7) <sup>b</sup> | 284.9 (216.5-384.6) <sup>c</sup> | 129.5 (91.4-240.7) | 182.6 (130.9-273.0)           | 199.0 (150.4-324.3)   |

Biomarker values are expressed in pg/ml as median (IQR range). <sup>a</sup> vs. sporadic  $\leq 0.05$ ; <sup>b</sup> vs. genetic *GRN*  $\leq 0.05$ ; <sup>c</sup> vs. genetic Others  $\leq 0.05$ . <sup>#</sup>The FTD-ALS phenotype was slightly more frequent in the genetic (22.2%) than sporadic group (9.7%).

**Fig. S1.** Plasma NfL levels in the SNAP group according with the clinical presentation.

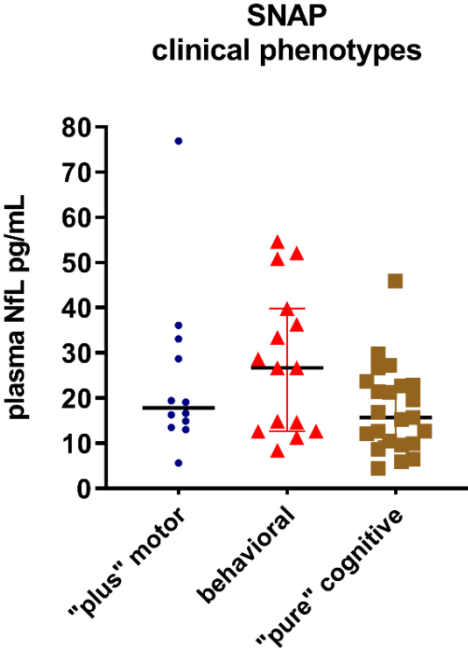

**Fig. S2.** Accuracy of plasma NfL, p-tau181 and GFAP in discriminating between healthy controls and disease groups.

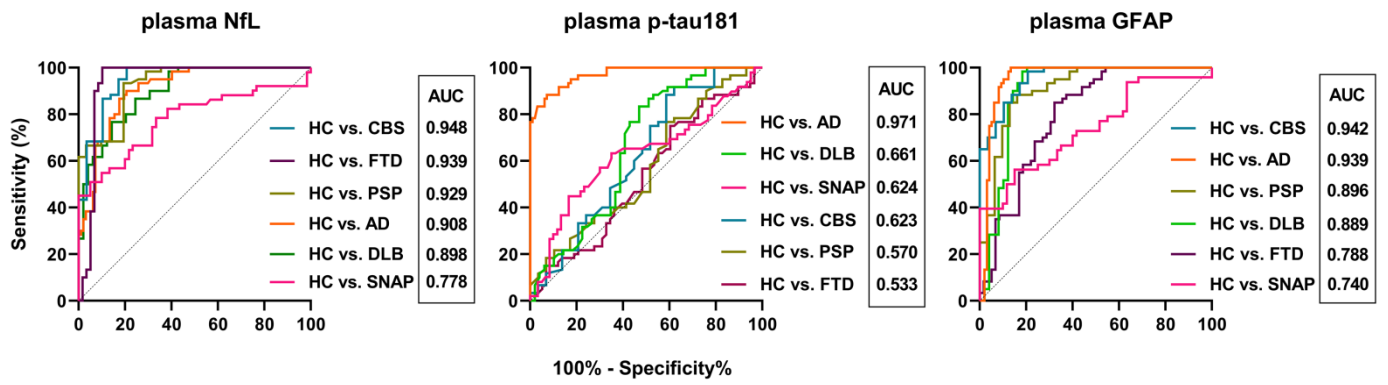



**Fig. S3.** Comparisons between CSF and plasma accuracy for each biomarker across disease groups.

**NfL**

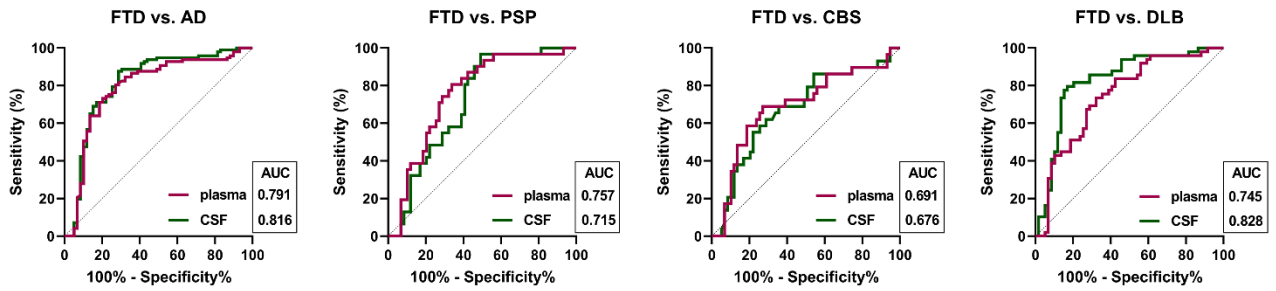

**p-tau181**

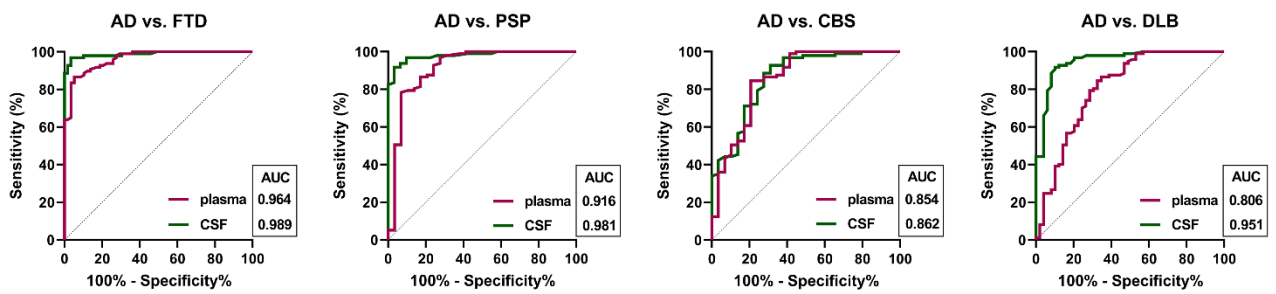

**GFAP**

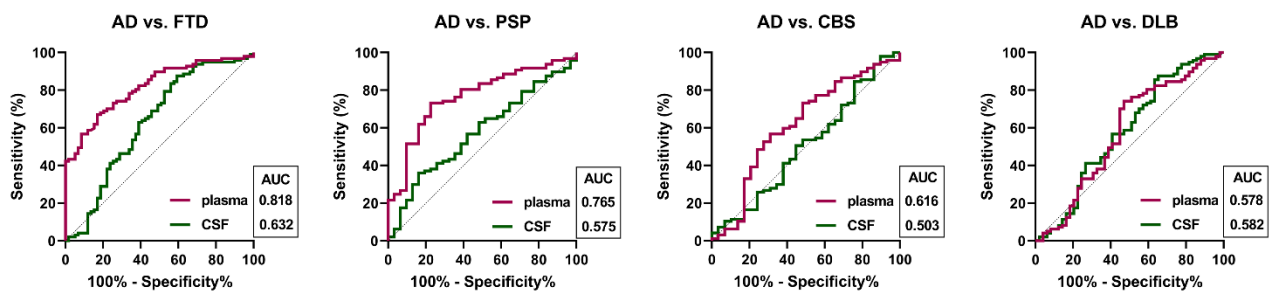

**Fig. S4.** Plasma biomarker levels in CBS and DLB according with the amyloid status (left) and ROC curves after excluding A+ cases in non-AD disease groups (right).

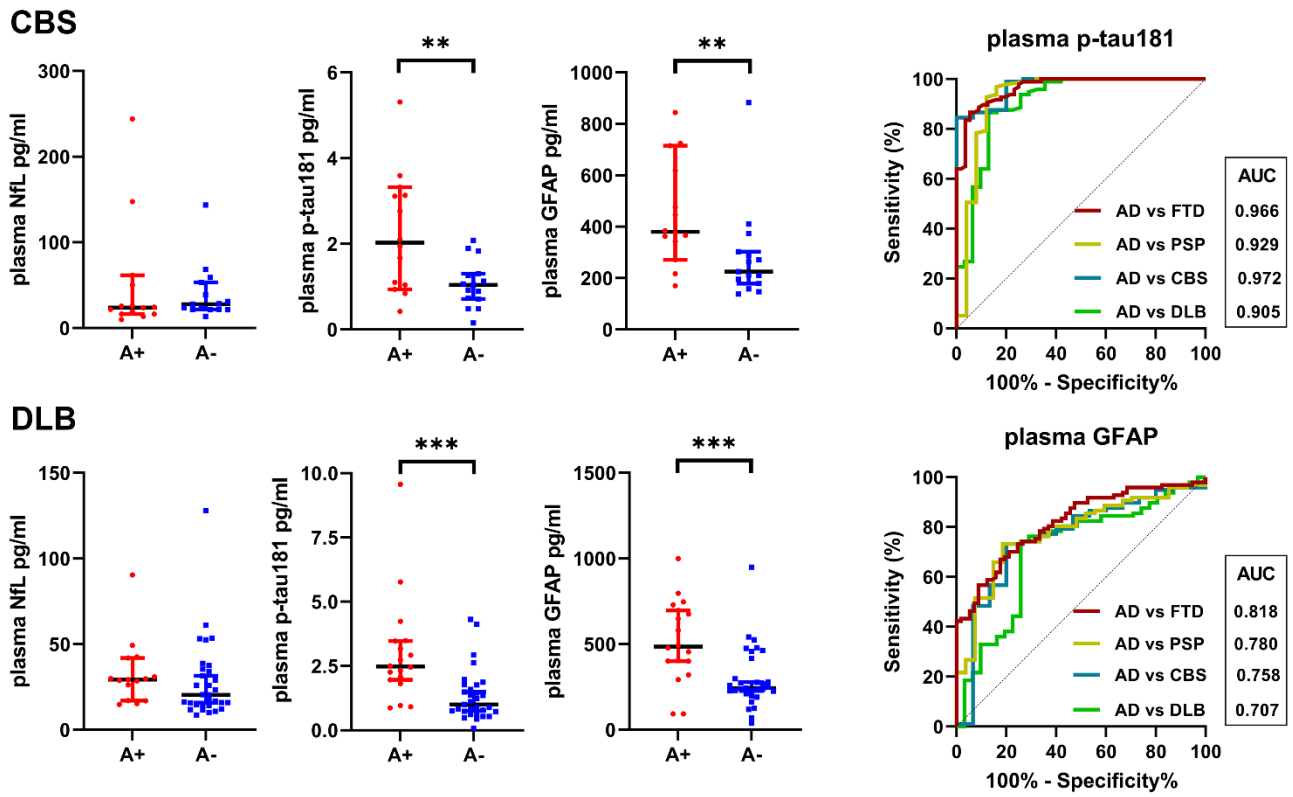

Supplement: MOESM1 [file 23595898]
